# Supplementary material for: Scalable, Adaptive, and Risk-Informed Design of Hydrological Sensor Networks
Source: Research Square preprint supplement (doi:10.21203/rs.3.rs-6038740/v1), 2025-03-20
Supplement: Supplementary file 1 [file 472569b7e0a14eaad6bbddac.pdf]

# Supplementary Information for

## *Scalable, Adaptive, and Risk-Informed Design of Hydrological Sensor Networks*

Jeil Oh and Matt Bartos

### Contents

- Section 1: Mathematical formulation of benchmark sensor placement methods
- Section 2: Algorithmic Overview
- Section 3: Supplementary Figures
- Section 4: Supplementary Tables

# 1 Mathematical formulation of benchmark sensor placement methods

## 1.1 Betweenness Centrality

Betweenness centrality quantifies the importance of a node in a graph based on the number of shortest paths passing through it. For a graph  $G = (V, E)$ , where  $V$  is the set of nodes and  $E$  is the set of edges, the betweenness centrality  $C_B(v)$  of a node  $v \in V$  is defined as:

$$C_B(v) = \sum_{s \neq v \neq t \in V} \frac{\sigma_{st}(v)}{\sigma_{st}}, \quad (1)$$

where  $\sigma_{st}$  is the total number of shortest paths between nodes  $s$  and  $t$ ,  $\sigma_{st}(v)$  is the number of shortest paths between  $s$  and  $t$  that pass through node  $v$ .

Nodes with higher  $C_B(v)$  scores are more central in the network, acting as key bridges for flow or network connectivity. Betweenness centrality is particularly effective for identifying nodes with topological significance in sensor placement.

## 1.2 Leverage Score Method

The leverage score method identifies critical spatial locations by analyzing the contribution of each location to the principal components of the dataset. Given a data matrix  $\mathbf{X} \in \mathbb{R}^{m \times n}$ , where rows represent spatial locations and columns represent temporal observations, the singular value decomposition (SVD) of  $\mathbf{X}$  is:

$$\mathbf{X} = \mathbf{U}\mathbf{\Sigma}\mathbf{V}^\top, \quad (2)$$

where  $\mathbf{U} \in \mathbb{R}^{m \times m}$  is the matrix of left singular vectors,  $\mathbf{\Sigma} \in \mathbb{R}^{m \times n}$  is the diagonal matrix of singular values, and  $\mathbf{V} \in \mathbb{R}^{n \times n}$  is the matrix of right singular vectors.

The leverage score  $\ell_i$  for the  $i$ -th row (spatial location) of  $\mathbf{X}$  is computed as:

$$\ell_i = \|\mathbf{u}_i\|^2, \quad (3)$$

where  $\mathbf{u}_i$  is the  $i$ -th row of  $\mathbf{U}_k$ , the truncated matrix containing the first  $k$  columns of  $\mathbf{U}$  corresponding to the largest  $k$  singular values. Expanding this, the leverage score can also be written as:

$$\ell_i = \sum_{j=1}^k U_{ij}^2, \quad (4)$$

where  $U_{ij}$  represents the  $(i, j)$ -th entry of  $\mathbf{U}_k$ , and  $k$  is determined based on the desired rank approximation of  $\mathbf{X}$ .

Rows with the highest leverage scores correspond to locations that contribute most significantly to the data's variability, making them ideal candidates for sensor placement.

## 2 Algorithmic Overview

To provide a clearer step-by-step procedure for our proposed sensor placement method, we summarize the framework in Algorithm 1.

---

**Algorithm 1** Sensor Placement using QR Decomposition with Column Pivoting

---

**Require:**  $\mathbf{X} \in \mathbb{R}^{n \times m}$  (data matrix), number of sensors  $r$ , optional weights  $\mathbf{W}$ , optional fixed column set  $F$

**Ensure:** Selected column set  $J$  corresponding to sensor locations

```

1: if weights are provided then
2:   Form  $\mathbf{X}_w = \mathbf{X}\mathbf{W}$ 
3: else
4:    $\mathbf{X}_w = \mathbf{X}$ 
5: end if
6: if fixed columns  $F$  are specified then
7:   Partition  $\mathbf{X}_w$  into  $\mathbf{X}_{w,F}$  and  $\mathbf{X}_{w,R}$ 
8:   Compute  $\mathbf{X}_{w,F} = \mathbf{Q}_F \mathbf{R}_F$ 
9:   Form  $\mathbf{X}'_{w,R} = \mathbf{X}_{w,R} - \mathbf{Q}_F (\mathbf{Q}_F^T \mathbf{X}_{w,R})$ 
10:  Apply pivoted QR to  $\mathbf{X}'_{w,R}$  to obtain permutation and factorization
11:  Combine fixed and pivoted columns to get full permutation  $\mathbf{P}$ 
12: else
13:  Apply pivoted QR directly to  $\mathbf{X}_w$  to obtain  $\mathbf{P}$ 
14: end if
15: Let  $J$  be the indices corresponding to the first  $r$  columns in  $\mathbf{P}$ 
16: return  $J$ 

```

---

In summary, our method identifies a near-optimal subset of sensor locations by leveraging the rank-revealing properties of the pivoted QR factorization. The approach is flexible, accommodating fixed sensors, weighted priorities, and large-scale datasets.

### 43 3 Supplementary Figures

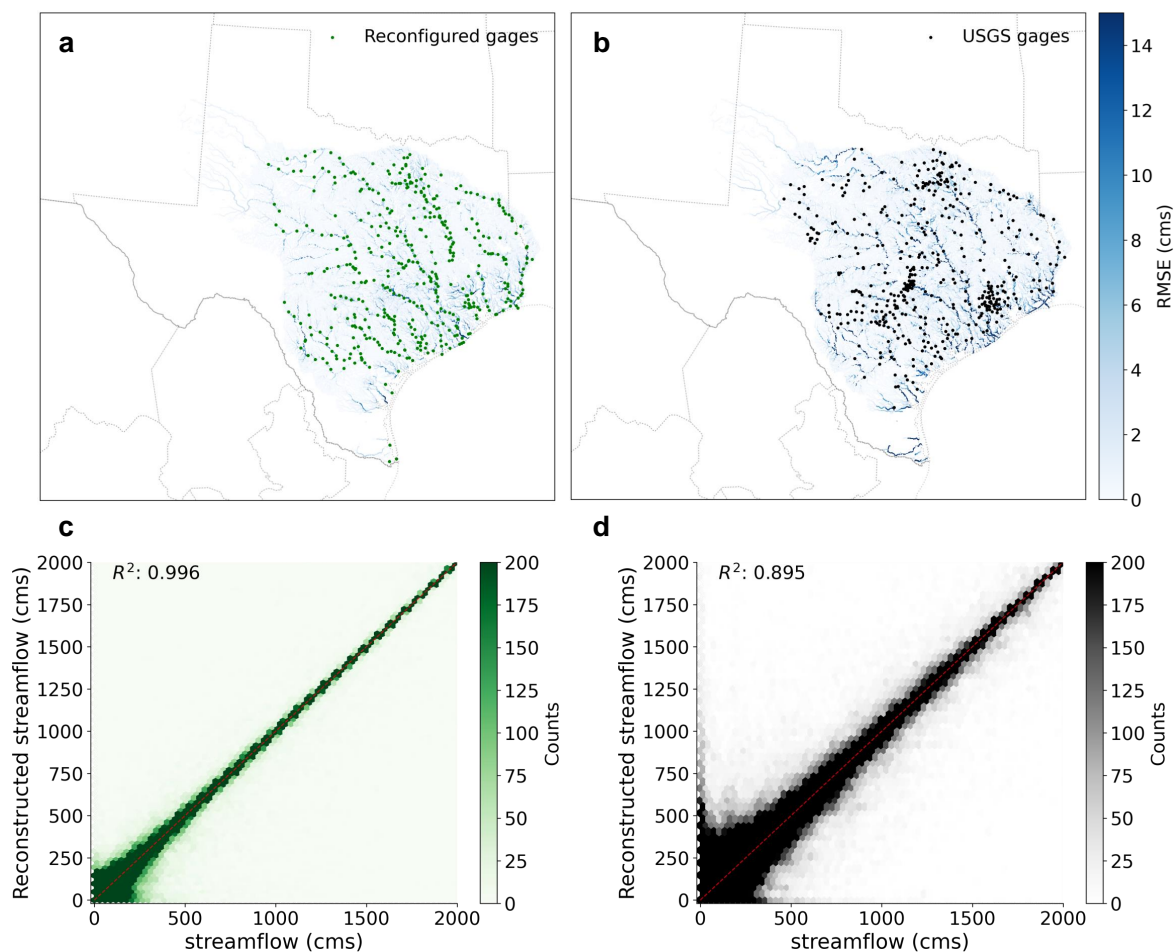

Figure 1: Comparison of streamflow reconstruction performance between the QR-based sensor placement framework and the current U.S. Geological Survey (USGS) gauge network. (a) Reconfigured gauge network derived from the QR-based placement, with the background map displaying RMSE errors for each stream (darker colors indicate higher errors). (b) Existing USGS gauge network, with corresponding RMSE errors shown on the same scale for comparison. (c) Scatter plot comparing reconstructed streamflow from the QR-based sensor placement to the National Water Model (NWM) retrospective data, achieving an R-squared value of 0.996. (d) Scatter plot comparing reconstructed streamflow from the USGS gauge network to NWM retrospective data, yielding an R-squared value of 0.895.

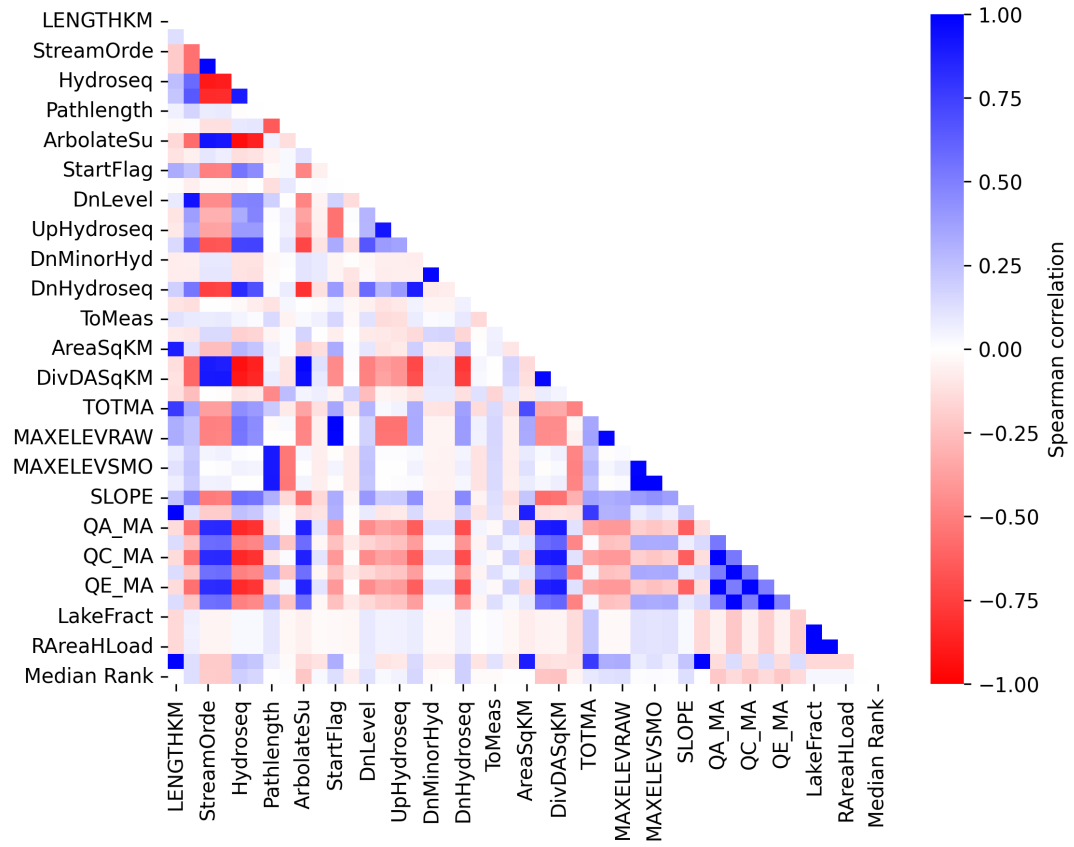

Figure 2: Spearman correlation plot between sensor rankings and key attributes from the National Hydrography Dataset (NHD), such as slope, drainage area, and stream order.

## 4 Supplementary Tables

Table 1: NHDPlus Variables and Descriptions

| <b>Variable Name</b> | <b>Description</b>                                                                                                                                                                                        |
|----------------------|-----------------------------------------------------------------------------------------------------------------------------------------------------------------------------------------------------------|
| <i>LengthKM</i>      | Length of the flowline in kilometers                                                                                                                                                                      |
| <i>StreamLeve</i>    | Stream level; distinguishes main stream paths from tributaries                                                                                                                                            |
| <i>StreamOrde</i>    | Stream order; Modified Strahler Stream Order                                                                                                                                                              |
| <i>StreamCalc</i>    | Stream Calculator                                                                                                                                                                                         |
| <i>Hydroseq</i>      | Hydrologic sequence number; places flowlines in hydrologic order                                                                                                                                          |
| <i>LevelPathI</i>    | Level Path Identifier–Hydrologic sequence number of most downstream NHD-Flowline feature in the level path                                                                                                |
| <i>PathLength</i>    | Distance to the terminal NHDFlowline feature downstream along the main path                                                                                                                               |
| <i>TerminalPa</i>    | Terminal Path Identifier - Hydrologic sequence number of terminal NHDFlowline feature                                                                                                                     |
| <i>ArbolateSu</i>    | Arbolate Sum - Kilometers of stream upstream of the bottom of the NHD-Flowline feature                                                                                                                    |
| <i>Divergence</i>    | Indicates flowline divergence: 0 = none, 1 = main, 2 = minor path                                                                                                                                         |
| <i>StartFlag</i>     | Start flag; 1 = start of flowline, 0 = not start                                                                                                                                                          |
| <i>TerminalFl</i>    | Terminal flag; 1 = terminal, 0 = not terminal                                                                                                                                                             |
| <i>DnLevel</i>       | Streamlevel of main stem downstream NHDflowline feature                                                                                                                                                   |
| <i>UpLevelPat</i>    | Upstream mainstem level path identifier                                                                                                                                                                   |
| <i>UpHydroSeq</i>    | Upstream mainstem hydrologic sequence number                                                                                                                                                              |
| <i>DnLevelPat</i>    | Downstream mainstem level path identifier                                                                                                                                                                 |
| <i>DnMinorHyd</i>    | Downstream minor hydrologic sequence number                                                                                                                                                               |
| <i>DnDrainCou</i>    | Count of NHDFlowline features immediately downstream                                                                                                                                                      |
| <i>DnHydroSeq</i>    | Downstream mainstem hydrologic sequence number                                                                                                                                                            |
| <i>FromMeas</i>      | ReachCode route measure (m-value) at bottom of NHDFlowline feature                                                                                                                                        |
| <i>ToMeas</i>        | ReachCode route measure (m-value) at top of NHDFlowline feature                                                                                                                                           |
| <i>RtnDiv</i>        | Returning Divergence Flag; 0 = no upstream divergences return at the top of this NHDFlowline feature, 1 = one or more upstream divergences returned to the network at the top of this NHDFlowline feature |
| <i>AreaSqKM</i>      | Area of the supercatchment in square kilometers                                                                                                                                                           |
| <i>TotDASqKM</i>     | Total Upstream Cumulative Drainage Area, in square kilometers, at the downstream end of the NHDFlowline feature                                                                                           |
| <i>DivDASqKM</i>     | Divergence-routed Cumulative Drainage Area, in square kilometers, at the downstream end of the NHDFlowline feature                                                                                        |
| <i>Tidal</i>         | Indicates tidal influence; 1 = tidal, 0 = not tidal.                                                                                                                                                      |
| <i>TOTMA</i>         | Mean Annual Time of Travel (days)                                                                                                                                                                         |
| <i>HWNodeSqKM</i>    | Catchment area in square kilometers that drains to the headwater node of the NHDFlowline feature                                                                                                          |
| <i>MaxElevRaw</i>    | Maximum elevation (unsmoothed) in centimeters                                                                                                                                                             |
| <i>MinElevRaw</i>    | Minimum elevation (unsmoothed) in centimeters                                                                                                                                                             |
| <i>MaxElevSmo</i>    | Maximum elevation (smoothed) in centimeters                                                                                                                                                               |
| <i>MinElevSmo</i>    | Minimum elevation (smoothed) in centimeters                                                                                                                                                               |
| <i>Slope</i>         | Slope of flowline (meters/meters) based on smoothed elevations                                                                                                                                            |
| <i>SlopeLenKm</i>    | NHDFlowline feature length (kilometers) used to compute slope.                                                                                                                                            |
| <i>QA_MA</i>         | Mean Annual Flow from runoff (cfs)                                                                                                                                                                        |
| <i>VA_MA</i>         | Mean Annual Velocity for QA (fps)                                                                                                                                                                         |
| <i>QC_MA</i>         | Mean Annual Flow with Reference Gage Regression applied to QB (cfs)                                                                                                                                       |
| <i>VC_MA</i>         | Mean Annual Velocity for QC (fps)                                                                                                                                                                         |
| <i>QE_MA</i>         | Mean Annual Flow from gage adjustment (cfs)                                                                                                                                                               |
| <i>VE_MA</i>         | Mean Annual Velocity from gage adjustment (fps)                                                                                                                                                           |
| <i>LakeFract</i>     | Fraction of lake assigned to Flowline                                                                                                                                                                     |
| <i>SurfArea</i>      | Lake surface area assigned to flowline in square meters                                                                                                                                                   |
| <i>RAreaHLoad</i>    | Reciprocal area hydraulic loads assigned to flowline in days/meter                                                                                                                                        |
